# Supplementary material for: Evaluation of Online Counseling through the Working Experiences of Mental Health Therapists Amidst the COVID-19 Pandemic
Source: MDPI journal article supplement (doi:10.3390/healthcare12040495), 2024-02-19
Supplement: s1 [file s1]

| Participants' code numbers | Gender | Age | Profession                               | Educational Background | Years of employment | Health / Social Service                          |
|----------------------------|--------|-----|------------------------------------------|------------------------|---------------------|--------------------------------------------------|
| R1                         | F      | 48  | Social Worker / psychotherapist          | University /MSc        | 20                  | Private office                                   |
| R2                         | F      | 60  | Psychologist / psychotherapist           | University /MA/PhD     | 30                  | Private office                                   |
| R3                         | F      | 50  | Consultant                               | University/MA          | 22                  | Social Service (public service)                  |
| R4                         | F      | 52  | Psychologist / psychotherapist           | University/MA          | 25                  | Private office                                   |
| R5                         | F      | 32  | Social Worker                            | University /MSc        | 8                   | Social Service (public service)                  |
| R6                         | F      | 63  | Psychologist / psychotherapist           | University /MSc        | 12                  | Private office                                   |
| R7                         | F      | 49  | Social Worker /psychotherapist           | University             | 22                  | Social Service (public service) + Private office |
| R8                         | F      | 43  | Psychologist / psychotherapist           | University/MA          | 15                  | Social Service (public service) + Private office |
| R9                         | F      | 34  | Social Worker / Sociologist              | University             | 5                   | Private office                                   |
| R10                        | F      | 54  | Psychologist / psychotherapist           | University             | 20                  | Social Service (public service) + Private office |
| R11                        | F      | 52  | Psychologist / psychotherapist           | University/MA          | 24                  | Private office                                   |
| R12                        | F      | 47  | Psychologist / psychotherapist           | University/MA          | 12                  | Private office                                   |
| R13                        | F      | 35  | Psychologist / psychotherapist           | University/MA          | 5                   | Social Service (public service) + Private office |
| R14                        | F      | 39  | Social Worker / psychotherapist          | University             | 15                  | Private office                                   |
| R15                        | F      | 55  | Psychologist / psychotherapist           | University /MSc        | 13                  | Private office                                   |
| R16                        | F      | 39  | Social Worker / mental health counsellor | University/MA          | 14                  | Social Service (public service)                  |
| R17                        | F      | 56  | Psychologist / psychotherapist           | University             | 32                  | Private office                                   |

**Table S1. Participants' socio-demographic characteristics**

| Main Themes                                                   | Subthemes                                                                                                                           | Codes                                                             | Indicative Words or Phrases                                                                                                    |
|---------------------------------------------------------------|-------------------------------------------------------------------------------------------------------------------------------------|-------------------------------------------------------------------|--------------------------------------------------------------------------------------------------------------------------------|
| 1. Evaluation of online counseling                            | 1.1. Working experience with online counseling<br>1.2. Overall assessment<br>1.3. Advantages and disadvantages of online counseling | Imposed condition<br><br>Worked well<br><br>Benefits vs drawbacks | <i>had to - did not prefer</i><br><br><i>was effective – satisfied</i><br><br><i>helpful – obstacles difficult to overcome</i> |
| 2. Comparing in-person and online counseling                  | 2.1. Similarities<br>2.2. Differences                                                                                               | Same process<br><br>Distinct issues                               | <i>issues are similar</i><br><br><i>there is a screen</i>                                                                      |
| 3. Factors influencing the effectiveness of online counseling | 3.1. Contextual factors<br><br>3.2. The therapeutic process                                                                         | Working conditions<br><br>Process qualities                       | <i>organizational structure – communication framework</i><br><br><i>method matters - the therapist and the person's needs</i>  |
| 4. Suggestions for the future use of online counseling        | 4.1. A supplementary tool used with caution<br>4.2. Create the appropriate conditions                                               | Add-on alternative<br><br>Development                             | <i>you have the option - additional tool</i><br><br><i>education - know-how and digital accessibility</i>                      |

**Table S2: Main themes and sub-themes**
